# Supplementary material for: Neurotrophic factor Neuritin modulates T cell electrical and metabolic state for the balance of tolerance and immunity
Source: eLife. 2024 Nov 20;13:RP96812. doi: 10.7554/eLife.96812 (PMC11578584; doi:10.7554/eLife.96812)
Supplement: Figure 3—source data 2. [file elife-96812-fig3-data2.xlsx]

## Sheet: Sheet1
Figure 3-source data 2. Gene sets enriched in Nrn1-/- iTreg cells cultured under the reactivating condition.
Nrn1-/-	Ion channel and receptor
	LIGAND_GATED_MONOATOMIC_CATION_CHANNEL_ACTIVITY
	LIGAND_GATED_MONOATOMIC_ION_CHANNEL_ACTIVITY
	NEUROTRANSMITTER_RECEPTOR_ACTIVITY
	GABA_RECEPTOR_ACTIVITY
	TRANSMITTER_GATED_CHANNEL_ACTIVITY
	INTRACELLULAR_LIGAND_GATED_MONOATOMIC_ION_CHANNEL_ACTIVITY
	G_PROTEIN_COUPLED_AMINE_RECEPTOR_ACTIVITY
	LIGAND_GATED_MONOATOMIC_CATION_CHANNEL_ACTIVITY
	POSTSYNAPTIC_NEUROTRANSMITTER_RECEPTOR_ACTIVITY
	NEUROTRANSMITTER_RECEPTOR_ACTIVITY_INVOLVED_IN_REGULATION_OF_POSTSYNAPTIC_MEMBRANE_POTENTIAL
	LIGAND_GATED_CALCIUM_CHANNEL_ACTIVITY
	Receptor kinase activity
	TRANSMEMBRANE_RECEPTOR_PROTEIN_KINASE_ACTIVITY
	TRANSMEMBRANE_RECEPTOR_PROTEIN_TYROSINE_KINASE_ACTIVITY
ctrl	Chaperone protein folding
	ATP_DEPENDENT_PROTEIN_FOLDING_CHAPERONE
	PROTEIN_FOLDING_CHAPERONE
	UNFOLDED_PROTEIN_BINDING
	Translation regulator activity
	TRANSLATION_REGULATOR_ACTIVITY_NUCLEIC_ACID_BINDING
	TRANSLATION_REGULATOR_ACTIVITY
Gene sets involved in Figure 3B clusters enriched in Nrn1-/- and ctrl iTreg cells reactivated with anti-CD3.
