# Supplementary material for: Neurotrophic factor Neuritin modulates T cell electrical and metabolic state for the balance of tolerance and immunity
Source: eLife. 2024 Nov 20;13:RP96812. doi: 10.7554/eLife.96812 (PMC11578584; doi:10.7554/eLife.96812)
Supplement: Figure 3—source data 3. [file elife-96812-fig3-data3.xlsx]

## Sheet: Sheet1
Figure 3-source data 3. Comparison of gene sets enriched in Nrn1-/- iTreg cells cultured under the resting and TCR restimulation condition.
Nrn1-/-	Resting and TCR restimulation
	TRANSMEMBRANE_RECEPTOR_PROTEIN_KINASE_ACTIVITY
	TRANSMEMBRANE_RECEPTOR_PROTEIN_TYROSINE_KINASE_ACTIVITY
	POSTSYNAPTIC_NEUROTRANSMITTER_RECEPTOR_ACTIVITY
	NEUROTRANSMITTER_RECEPTOR_ACTIVITY_INVOLVED_IN_REGULATION_OF_POSTSYNAPTIC_MEMBRANE_POTENTIAL
	Resting
	SODIUM_CHANNEL_ACTIVITY
	VOLTAGE_GATED_SODIUM_CHANNEL_ACTIVITY
	MONOATOMIC_ANION_MONOATOMIC_CATION_SYMPORTER_ACTIVITY
	SODIUM_ION_TRANSMEMBRANE_TRANSPORTER_ACTIVITY
	MONOATOMIC_ANION_SODIUM_SYMPORTER_ACTIVITY
	SOLUTE_SODIUM_SYMPORTER_ACTIVITY
	ORGANIC_ACID_SODIUM_SYMPORTER_ACTIVITY
	SOLUTE_MONOATOMIC_CATION_SYMPORTER_ACTIVITY
	TCR restimulation
	LIGAND_GATED_MONOATOMIC_CATION_CHANNEL_ACTIVITY
	LIGAND_GATED_MONOATOMIC_ION_CHANNEL_ACTIVITY
	NEUROTRANSMITTER_RECEPTOR_ACTIVITY
	GABA_RECEPTOR_ACTIVITY
	TRANSMITTER_GATED_CHANNEL_ACTIVITY
	INTRACELLULAR_LIGAND_GATED_MONOATOMIC_ION_CHANNEL_ACTIVITY
	G_PROTEIN_COUPLED_AMINE_RECEPTOR_ACTIVITY
	LIGAND_GATED_CALCIUM_CHANNEL_ACTIVITY
Listing of gene sets involved in Figure. 3C Venn diagram, comparisons of gene set cluster components in Nrn1-/- under resting vs. TCR restimulation condition.
