# Supplementary material for: Neurotrophic factor Neuritin modulates T cell electrical and metabolic state for the balance of tolerance and immunity
Source: eLife. 2024 Nov 20;13:RP96812. doi: 10.7554/eLife.96812 (PMC11578584; doi:10.7554/eLife.96812)
Supplement: Figure 4—source data 1. [file elife-96812-fig4-data1.xlsx]

## Sheet: Sheet1
Figure 4-source data 1. Gene sets enriched in Nrn1-/- and ctrl Te cells.
Nrn1-/-	Monoamine transport
	IMPORT_INTO_CELL
	MONOAMINE_TRANSPORT
	CATECHOLAMINE_TRANSPORT
	NEUROTRANSMITTER_REUPTAKE
	Membrane repolarization
	CELL_CELL_SIGNALING_INVOLVED_IN_CARDIAC_CONDUCTION
	CARDIAC_MUSCLE_CELL_ACTION_POTENTIAL_INVOLVED_IN_CONTRACTION
	Membrane_Repolarization
	CARDIAC_MUSCLE_CELL_MEMBRANE_REPOLARIZATION
	CARDIAC_MUSCLE_CELL_ACTION_POTENTIAL
	CARDIAC_CONDUCTION
	MEMBRANE_REPOLARIZATION_DURING_CARDIAC_MUSCLE_CELL_ACTION_POTENTIAL
	Cell junction
	CELL_CELL_JUNCTION_ASSEMBLY
	ADHERENS_JUNCTION_ORGANIZATION
Ctrl	Transporter & Oxidoreduction
	ACTIVE_TRANSMEMBRANE_TRANSPORTER_ACTIVITY
	PROTON_TRANSMEMBRANE_TRANSPORTER_ACTIVITY
	OXIDOREDUCTASE_ACTIVITY_ACTING_ON_NAD_P_H
	PRIMARY_ACTIVE_TRANSMEMBRANE_TRANSPORTER_ACTIVITY
	OXIDOREDUCTION_DRIVEN_ACTIVE_TRANSMEMBRANE_TRANSPORTER_ACTIVITY
	ELECTRON_TRANSFER_ACTIVITY
	Sensory perception
	SENSORY_PERCEPTION_OF_CHEMICAL_STIMULUS
	SENSORY_PERCEPTION_OF_SMELL
Gene sets involved in Fig. 4F gene sets clusters enriched in Nrn1-/- and ctrl Te cells.
