# Supplementary material for: Neurotrophic factor Neuritin modulates T cell electrical and metabolic state for the balance of tolerance and immunity
Source: eLife journal article supplement (doi:10.7554/elife.96812), 2024-06-12
Supplement: mdarchecklist1 [file elife-96812-mdarchecklist1-v1.pdf]

## **Materials Design Analysis Reporting (MDAR)** **Checklist for Authors**

The [MDAR framework](#) establishes a minimum set of requirements in transparent reporting mainly applicable to studies in the life sciences.

*eLife* asks authors to **provide detailed information within their article** to facilitate the interpretation and replication of their work. Authors can also upload supporting materials to comply with relevant reporting guidelines for health-related research (see [EQUATOR Network](#)), life science research (see the [BioSharing Information Resource](#)), or animal research (see the [ARRIVE Guidelines](#) and the [STRANGE Framework](#); for details, see *eLife's* [Journal Policies](#)). Where applicable, authors should refer to any relevant reporting standards materials in this form.

For all that apply, please note **where in the article** the information is provided. Please note that we also collect information about data availability and ethics in the submission form.

### **Materials:**

| <b>Newly created materials</b>                      | <b>Indicate where provided:<br/>section/figure legend</b>                 | <b>N/A</b> |
|-----------------------------------------------------|---------------------------------------------------------------------------|------------|
| Nrn1 antibody clone 1A10<br>Nrn1 antibody clone 1D6 | Fig. 1 B-D, Fig.1-figure supplement 1C&D<br>Fig. 3-figure supplementary 2 |            |

| <b>Antibodies</b>                                                                                             | <b>Indicate where provided:<br/>section/figure legend</b> | <b>N/A</b> |
|---------------------------------------------------------------------------------------------------------------|-----------------------------------------------------------|------------|
| All commercial antibody and clones are listed in the material methods section and in the key resources table. | Fig. 1H, Fig. 2, Fig. 3, Fig. 4, Fig. 5                   | N/A        |

| DNA and RNA sequences | Indicate where provided:<br>section/figure legend | N/A |
|-----------------------|---------------------------------------------------|-----|
| N/A                   |                                                   | N/A |

| Cell materials                                                 | Indicate where provided:<br>section/figure legend | N/A |
|----------------------------------------------------------------|---------------------------------------------------|-----|
|                                                                | N/A                                               |     |
| Primary culture from Nrn1 <sup>-/-</sup> mice and C56/BL6 mice | Fig. 1, 2, 3, 4, 5                                | N/A |

| Experimental animals                       | Indicate where provided:<br>section/figure legend | N/A |
|--------------------------------------------|---------------------------------------------------|-----|
| animal model listed in key resources table | key resources table                               |     |
|                                            |                                                   | N/A |

| Plants and microbes | Indicate where provided:<br>section/figure legend | N/A |
|---------------------|---------------------------------------------------|-----|
| N/A                 |                                                   | N/A |
|                     |                                                   | N/A |

|                                    |                                                                                                          |            |
|------------------------------------|----------------------------------------------------------------------------------------------------------|------------|
| <b>Human research participants</b> | <b>Indicate where provided: section/figure legend) or state if these demographics were not collected</b> | <b>N/A</b> |
| N/A                                |                                                                                                          | N/A        |

**Design:**

|                       |                                                       |            |
|-----------------------|-------------------------------------------------------|------------|
| <b>Study protocol</b> | <b>Indicate where provided: section/figure legend</b> | <b>N/A</b> |
| N/A                   |                                                       | N/A        |

|                            |                                                       |            |
|----------------------------|-------------------------------------------------------|------------|
| <b>Laboratory protocol</b> | <b>Indicate where provided: section/figure legend</b> | <b>N/A</b> |
| N/A                        |                                                       | N/A        |

|                                                                                |                                                                                                                  |            |
|--------------------------------------------------------------------------------|------------------------------------------------------------------------------------------------------------------|------------|
| <b>Experimental study design (statistics details) *</b>                        |                                                                                                                  |            |
| <b>For in vivo studies: State whether and how the following have been done</b> | <b>Indicate where provided: section/figure legend. If it could have been done, but was not, write "not done"</b> | <b>N/A</b> |
|                                                                                | Yes - see the Methods section entitled "Statistical analysis".                                                   |            |
|                                                                                | Yes - see the Methods section entitled "Statistical analysis".                                                   |            |
|                                                                                | Yes - see the Methods section entitled "Statistical analysis".                                                   |            |
|                                                                                | Yes - see the Methods section entitled "Statistical analysis".                                                   |            |

|                                                        |                                                                                                                                                                       |            |
|--------------------------------------------------------|-----------------------------------------------------------------------------------------------------------------------------------------------------------------------|------------|
| <b>Sample definition and in-laboratory replication</b> | <b>Indicate where provided: section/figure legend</b>                                                                                                                 | <b>N/A</b> |
| three to more times                                    | Experiments were replicated at least 3 times. Sample sizes are shown in Tables and Figure legends, and represent biological replicates (individual cells or animals). |            |

|                                                                  |                                                                    |  |
|------------------------------------------------------------------|--------------------------------------------------------------------|--|
| Define whether data describe technical or biological replicates. | Data describe biological replicates (individual cells or animals). |  |
|------------------------------------------------------------------|--------------------------------------------------------------------|--|

| <b>Ethics</b>                                                                                                                                                | <b>Indicate where provided:<br/>section/submission form</b>                                                                                                                                                                                                                                                                                                                                                                                                                                                                                                                                                                               | <b>N/A</b> |
|--------------------------------------------------------------------------------------------------------------------------------------------------------------|-------------------------------------------------------------------------------------------------------------------------------------------------------------------------------------------------------------------------------------------------------------------------------------------------------------------------------------------------------------------------------------------------------------------------------------------------------------------------------------------------------------------------------------------------------------------------------------------------------------------------------------------|------------|
|                                                                                                                                                              |                                                                                                                                                                                                                                                                                                                                                                                                                                                                                                                                                                                                                                           | N/A        |
| Studies involving experimental animals: State details of authority granting ethics approval (IRB or equivalent committee(s), animal protocol number M019M233 | Research involving vertebrate animals was done at the Johns Hopkins University following protocols reviewed and approved by the Institutional Animal Care and Use Committee IACUC) - Animal Welfare Assurance Number M019M233. . The animals were housed in NIH-approved facilities and are observed daily by technicians. Unusual events are reported to the on call veterinarian, as well as to the investigator according to posted protocols. Other maintenance veterinary care was conducted according to NIH guidelines on the Use and Care of Animals. Facilities were inspected regularly according to NIH and AAALAC guidelines. |            |
|                                                                                                                                                              |                                                                                                                                                                                                                                                                                                                                                                                                                                                                                                                                                                                                                                           | N/A        |

| <b>Dual Use Research of Concern (DURC)</b> | <b>Indicate where provided:<br/>section/submission form</b> | <b>N/A</b> |
|--------------------------------------------|-------------------------------------------------------------|------------|
|                                            |                                                             | N/A        |

**Analysis:**

| Attrition | Indicate where provided:<br>section/figure legend           | N/A |
|-----------|-------------------------------------------------------------|-----|
|           | All data generated or analyzed are included in the figures. |     |

| Statistics              | Indicate where provided:<br>section/figure legend        | N/A |
|-------------------------|----------------------------------------------------------|-----|
| Student t-test or ANOVA | See the Methods section entitled "Statistical analysis". |     |

| Data availability                                                                                                                                                | Indicate where provided:<br>section/submission form                                          | N/A |
|------------------------------------------------------------------------------------------------------------------------------------------------------------------|----------------------------------------------------------------------------------------------|-----|
| For newly created and reused datasets, the manuscript includes a data availability statement that provides details for access (or notes restrictions on access). | All data associated with this study are present in the paper or the Supplementary Materials. |     |
|                                                                                                                                                                  |                                                                                              | N/A |
|                                                                                                                                                                  |                                                                                              |     |

| Code availability | Indicate where provided:<br>section/figure legend | N/A |
|-------------------|---------------------------------------------------|-----|
| N/A               |                                                   |     |
|                   |                                                   | N/A |

|                                                                                                         |     |
|---------------------------------------------------------------------------------------------------------|-----|
| If reused code is publicly available provide accession number in repository OR DOI OR URL, OR citation. | N/A |
|---------------------------------------------------------------------------------------------------------|-----|

**Reporting:**

The MDAR framework recommends adoption of discipline-specific guidelines, established and endorsed through community initiatives.

| Adherence to community standards                                                                                                                                                | Indicate where provided: section/figure legend | N/A |
|---------------------------------------------------------------------------------------------------------------------------------------------------------------------------------|------------------------------------------------|-----|
| State if relevant guidelines (e.g., ICMJE, MIBBI, ARRIVE, STRANGE) have been followed, and whether a checklist (e.g., CONSORT, PRISMA, ARRIVE) is provided with the manuscript. |                                                | N/A |

\* We provide the following guidance regarding transparent reporting and statistics; we also refer authors to [Ten common statistical mistakes to watch out for when writing or reviewing a manuscript.](#)

**Sample-size estimation**

- You should state whether an appropriate sample size was computed when the study was being designed
- You should state the statistical method of sample size computation and any required assumptions
- If no explicit power analysis was used, you should describe how you decided what sample (replicate) size (number) to use

**Replicates**

- You should report how often each experiment was performed
- You should include a definition of biological versus technical replication
- The data obtained should be provided and sufficient information should be provided to indicate the number of independent biological and/or technical replicates
- If you encountered any outliers, you should describe how these were handled
- Criteria for exclusion/inclusion of data should be clearly stated
- High-throughput sequence data should be uploaded before submission, with a private link for reviewers provided (these are available from both GEO and ArrayExpress)

**Statistical reporting**

- Statistical analysis methods should be described and justified
- Raw data should be presented in figures whenever informative to do so (typically when N per group is less than 10)
- For each experiment, you should identify the statistical tests used, exact values of N, definitions of center, methods of multiple test correction, and dispersion and precision measures (e.g., mean, median, SD, SEM, confidence intervals; and, for the major substantive results, a measure of effect size (e.g., Pearson's r, Cohen's d)
- Report exact p-values wherever possible alongside the summary statistics and 95% confidence intervals. These should be reported for all key questions and not only when the p-value is less than 0.05.

**Group allocation**

- Indicate how samples were allocated into experimental groups (in the case of clinical studies,

please specify allocation to treatment method); if randomization was used, please also state if restricted randomization was applied

- Indicate if masking was used during group allocation, data collection and/or data analysis
