# Supplementary figures and images for: Neurotrophic factor Neuritin modulates T cell electrical and metabolic state for the balance of tolerance and immunity
Source: eLife journal article supplement (doi:10.7554/elife.96812), 2024-06-12

NRN1  
15KD →

CD4 T cell sample

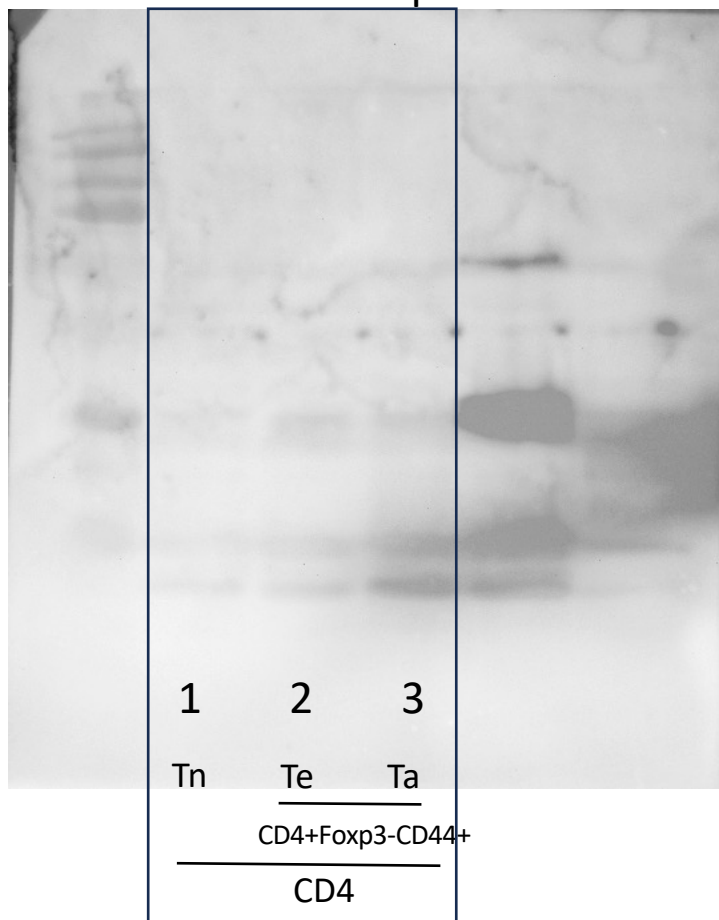

CD4 T cell sample

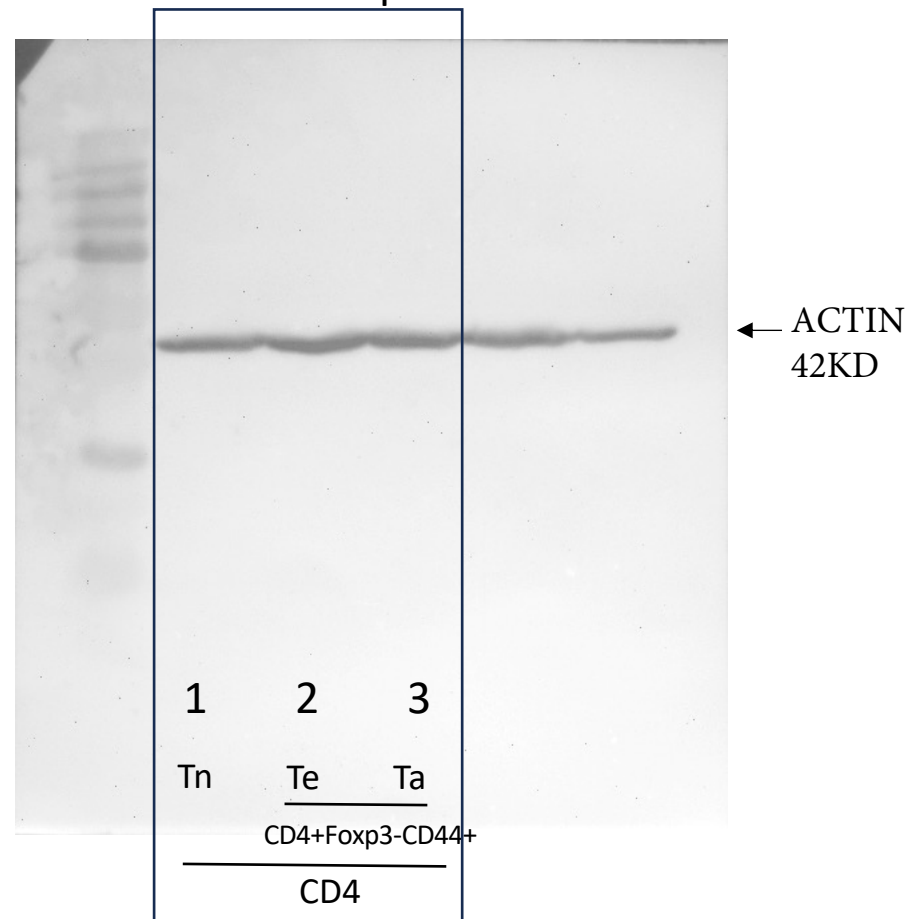

Supplement: fig1-data1 [file elife-96812-fig1-data1-v1.zip]

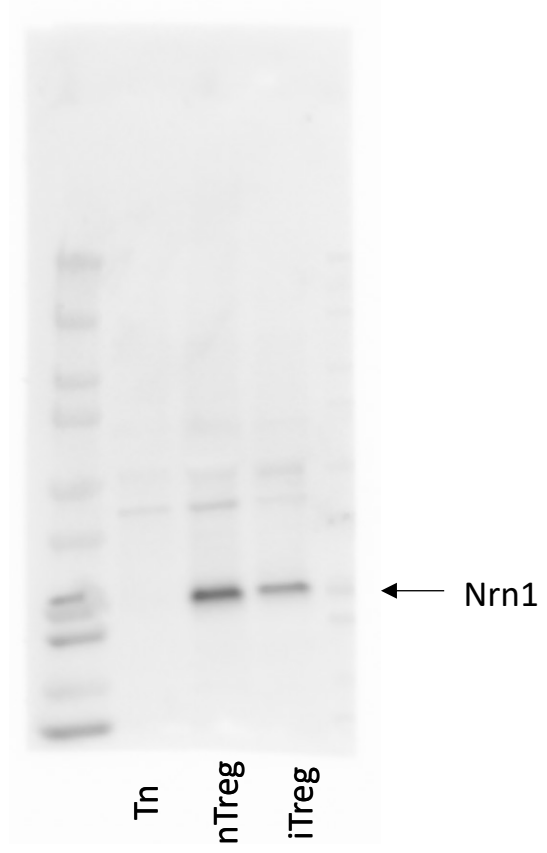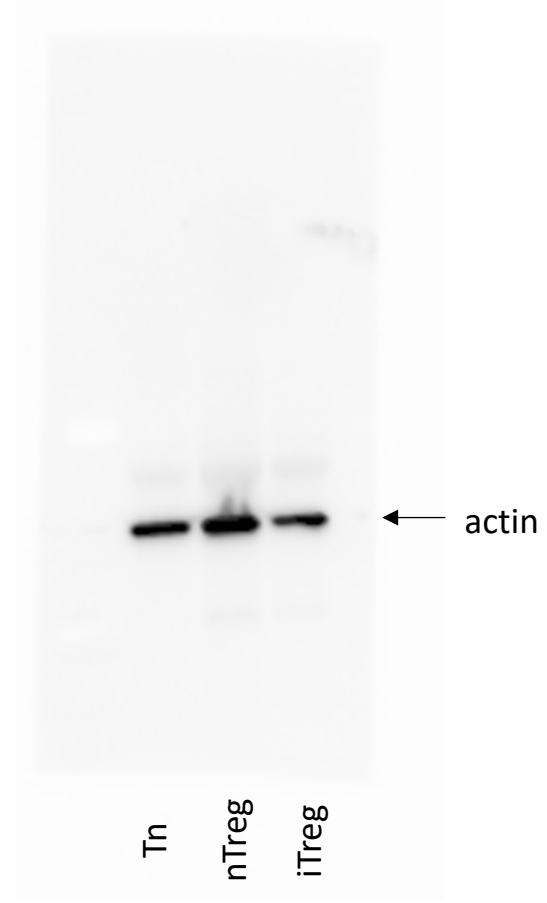

Supplement: fig1-data3 [file elife-96812-fig1-data3-v1.zip]
